# Supplementary material for: Time Is the Wisest Counselor of All: The Value of Provider–Patient Engagement Length in Home Healthcare
Source: Atypon-hosted journal article supplement (doi:10.1287/mnsc.2020.3921), 2021-03-08
Supplement: mnsc.2020.3921.sm1.pdf [file mnsc.2020.3921.sm1.pdf]

## Appendix

Table EC.1. Summary definitions of control variables

Table EC.2. Effect of visit length on hospital readmission, including coefficients for all control variables

Table EC.3. Effect of visit length on hospital readmission, using hazard models, including coefficients for all control variables

Table EC.4. Heterogeneous effects of visit length on hospital readmission, by patient characteristics, including coefficients for all control variables

Table EC.5. Heterogeneous effects of visit length on hospital readmission, by visit characteristics including coefficients for all control variables

Table EC.6. Effect of visit length on hospital readmission, using fixed effects

Table EC.7. Effect of leave-out IV on pre-planned readmission and on hospitalization following discharge from a lower-acuity facility

Table EC.8. Effect of visit length on hospital readmission, using alternate set of control variables

Table EC.9. Effect of visit length on hospital readmission, using alternate estimation models

Table EC.10. Effect of visit length on hospitalization, using sample not restricted to patients previously discharged from short-term acute care hospital

Figure EC.1. Predicted probability of hospital readmission using alternate non-linear models

Table EC.1 Summary definitions of control variables

| Variable                                                                   | Description                                                                                     |
|----------------------------------------------------------------------------|-------------------------------------------------------------------------------------------------|
| <b>Operational characteristics</b>                                         |                                                                                                 |
| Visit sequence percentile <sup>†</sup>                                     | Percentile of sequence of current visit within episode                                          |
| Moving average of visit length <sup>†</sup>                                | Average length of visit for visits that occurred prior to current visit                         |
| Moving average of days to next visit <sup>†</sup>                          | Average number of days to next visit for visits that occurred prior to current visit            |
| New patient for provider <sup>†</sup>                                      | Indicator for whether this is first visit by provider for patient                               |
| Start hour of provider                                                     | Start hour of provider's work day                                                               |
| Episode with subsequent episodes <sup>†</sup>                              | Indicator for whether current episode resulted in a subsequent episode                          |
| Episode with any resumption of care or recertification visits <sup>†</sup> | Indicator for whether current episode included any resumption of care or recertification visits |
| <b>Demographic characteristics</b>                                         |                                                                                                 |
| Age                                                                        | Patient age in years                                                                            |
| Male                                                                       | Indicator for whether patient is male                                                           |
| White                                                                      | Indicator for whether patient is White                                                          |
| Black                                                                      | Indicator for whether patient is Black                                                          |
| Hispanic                                                                   | Indicator for whether patient is Hispanic                                                       |
| Asian                                                                      | Indicator for whether patient is Asian                                                          |
| <b>Health status</b>                                                       |                                                                                                 |
| Temporarily heightened                                                     | Indicator for whether patient's health status is temporarily heightened                         |
| Stable                                                                     | Indicator for whether patient's health status is stable                                         |
| Progressively worse                                                        | Indicator for whether patient's health status is progressively worse                            |
| <b>Living conditions</b>                                                   |                                                                                                 |
| Living alone                                                               | Indicator for whether patient is living alone                                                   |
| No assistance available                                                    | Indicator for whether patient has no assistance available                                       |
| <b>Prior hospitalization reasons</b>                                       |                                                                                                 |
| Urinary incontinence                                                       | Indicator for whether patient was hospitalized for urinary incontinence                         |
| Intractable pain <sup>†</sup>                                              | Indicator for whether patient was hospitalized for intractable pain                             |
| Impaired decision making                                                   | Indicator for whether patient was hospitalized for impaired decision making                     |
| Memory loss                                                                | Indicator for whether patient was hospitalized for memory loss                                  |
| Indwelling catheter                                                        | Indicator for whether patient was hospitalized for indwelling catheter                          |
| Disruptive behavior                                                        | Indicator for whether patient was hospitalized for disruptive behavior                          |
| Unknown                                                                    | Indicator for whether patient was hospitalized for an unknown reason                            |
| None of the above <sup>†</sup>                                             | Indicator for whether patient was hospitalized for none of the above                            |
| <b>Risks for hospitalization</b>                                           |                                                                                                 |
| 2+ falls in past 12 months                                                 | Indicator for whether patient has had 2+ falls in past 12 months                                |
| Currently taking 5+ medications                                            | Indicator for whether patient is currently taking 5+ medications                                |
| 2+ hospitalizations in past 6 months                                       | Indicator for whether patient has had 2+ hospitalizations in past 6 months                      |
| Decline in mental health in past 3 months                                  | Indicator for whether patient has had a decline in mental health in past 3 months               |
| Other risks                                                                | Indicator for whether patient has other risks for hospitalization                               |
| <b>High risk factors</b>                                                   |                                                                                                 |
| Obesity                                                                    | Indicator for whether patient is obese                                                          |
| Smoking                                                                    | Indicator for whether patient is a smoker                                                       |
| Alcohol                                                                    | Indicator for whether patient uses alcohol                                                      |
| Drugs                                                                      | Indicator for whether patient uses drugs                                                        |

Notes. † Indicates variables that are selected by the least absolute shrinkage and selection operator (LASSO) procedure when choosing the largest lambda at which the mean-squared prediction error (MSPE) is within one standard error of the minimal MSPE.

**Table EC.2 Effect of visit length on hospital readmission, including coefficients for all control variables**

| VARIABLES                                                     | (1)<br>First stage       | (2)<br>2SLS              | (3)<br>OLS               | (4)<br>2SRI              | (5)<br>Probit            |
|---------------------------------------------------------------|--------------------------|--------------------------|--------------------------|--------------------------|--------------------------|
| Leave-out IV                                                  | 0.63305***<br>(0.01170)  |                          |                          |                          |                          |
| Visit length                                                  |                          | -0.00022***<br>(0.00004) | 0.00003+<br>(0.00002)    | -0.00681***<br>(0.00122) | 0.00010<br>(0.00046)     |
| <i>AME of visit length</i>                                    |                          |                          |                          | -0.00022***<br>(0.00004) | 0.00000<br>(0.00002)     |
| <b>Operational characteristics</b>                            |                          |                          |                          |                          |                          |
| Visit sequence percentile                                     | -0.27658*<br>(0.13564)   | 0.03313***<br>(0.00117)  | 0.03266***<br>(0.00116)  | 1.28791***<br>(0.03197)  | 1.27631***<br>(0.03304)  |
| Moving average of visit length                                | 0.20981***<br>(0.00445)  | 0.00029***<br>(0.00003)  | 0.00020***<br>(0.00002)  | 0.00934***<br>(0.00068)  | 0.00692***<br>(0.00058)  |
| Moving average of days to next visit                          | -0.32895***<br>(0.02238) | 0.00857***<br>(0.00033)  | 0.00866***<br>(0.00033)  | 0.09685***<br>(0.00266)  | 0.09932***<br>(0.00361)  |
| New patient for provider                                      | 2.19951***<br>(0.15327)  | 0.00782***<br>(0.00069)  | 0.00735***<br>(0.00069)  | 0.20639***<br>(0.01848)  | 0.19447***<br>(0.01853)  |
| Start hour of provider                                        | -0.06334*<br>(0.03047)   | -0.00024*<br>(0.00012)   | -0.00026*<br>(0.00012)   | -0.00461<br>(0.00341)    | -0.00518<br>(0.00369)    |
| Episode with subsequent episodes                              | 0.92244***<br>(0.19633)  | -0.14460***<br>(0.00381) | -0.14480***<br>(0.00381) | -1.16443***<br>(0.02490) | -1.16891***<br>(0.02417) |
| Episode with any resumption of care or recertification visits | 0.42116*<br>(0.16983)    | 0.15957***<br>(0.00376)  | 0.15946***<br>(0.00376)  | 1.61867***<br>(0.01962)  | 1.61500***<br>(0.01933)  |
| <b>Demographic characteristics</b>                            |                          |                          |                          |                          |                          |
| Age                                                           | -0.01057***<br>(0.00305) | 0.00006**<br>(0.00002)   | 0.00006**<br>(0.00002)   | 0.00117*<br>(0.00052)    | 0.00120*<br>(0.00050)    |
| Male                                                          | -0.07873<br>(0.06322)    | 0.00015<br>(0.00044)     | 0.00017<br>(0.00044)     | 0.01396<br>(0.01293)     | 0.01509<br>(0.01278)     |
| White                                                         | 0.58111<br>(0.39450)     | 0.01193***<br>(0.00308)  | 0.01192***<br>(0.00307)  | 0.24863***<br>(0.07377)  | 0.24277***<br>(0.06699)  |
| Black                                                         | -0.07983<br>(0.41218)    | 0.01350***<br>(0.00317)  | 0.01364***<br>(0.00317)  | 0.31197***<br>(0.07547)  | 0.31104***<br>(0.06848)  |
| Hispanic                                                      | -0.61412<br>(0.41047)    | 0.01229***<br>(0.00326)  | 0.01247***<br>(0.00325)  | 0.28856***<br>(0.07497)  | 0.28872***<br>(0.06906)  |
| Asian                                                         | 0.00414<br>(0.47240)     | 0.01143**<br>(0.00365)   | 0.01132**<br>(0.00365)   | 0.26562**<br>(0.08728)   | 0.25814**<br>(0.08572)   |
| <b>Health status</b>                                          |                          |                          |                          |                          |                          |
| Temporarily heightened                                        | -0.19807*<br>(0.09102)   | -0.00460***<br>(0.00056) | -0.00460***<br>(0.00056) | -0.13088***<br>(0.01335) | -0.13175***<br>(0.01392) |
| Stable                                                        | -0.09268<br>(0.15498)    | -0.00774***<br>(0.00080) | -0.00777***<br>(0.00080) | -0.24018***<br>(0.02482) | -0.24295***<br>(0.02686) |
| Progressively worse                                           | 0.36494+<br>(0.19372)    | 0.00458**<br>(0.00175)   | 0.00447*<br>(0.00175)    | 0.09755**<br>(0.03401)   | 0.09473**<br>(0.03223)   |
| <b>Living conditions</b>                                      |                          |                          |                          |                          |                          |
| Living alone                                                  | 0.10518<br>(0.07779)     | -0.00059<br>(0.00047)    | -0.00058<br>(0.00047)    | -0.01827<br>(0.01483)    | -0.01707<br>(0.01428)    |
| No assistance available                                       | -0.52565*<br>(0.25325)   | -0.00245<br>(0.00170)    | -0.00239<br>(0.00169)    | -0.02350<br>(0.04706)    | -0.02288<br>(0.04929)    |

**Table EC.2 Effect of visit length on hospital readmission, including coefficients for all control variables — Continued**

| VARIABLES                                 | (1)<br>First stage       | (2)<br>2SRI              | (3)<br>Probit            | (4)<br>2SLS              | (5)<br>OLS               |
|-------------------------------------------|--------------------------|--------------------------|--------------------------|--------------------------|--------------------------|
| <b>Prior hospitalization reasons</b>      |                          |                          |                          |                          |                          |
| Urinary incontinence                      | 0.19442+<br>(0.10377)    | 0.00173*<br>(0.00076)    | 0.00170*<br>(0.00076)    | 0.05363**<br>(0.02071)   | 0.05371**<br>(0.02078)   |
| Intractable pain                          | 0.65206***<br>(0.12965)  | 0.00230**<br>(0.00084)   | 0.00209*<br>(0.00084)    | 0.04478*<br>(0.02244)    | 0.03947+<br>(0.02273)    |
| Impaired decision making                  | -0.53400***<br>(0.11272) | 0.00148+<br>(0.00080)    | 0.00156+<br>(0.00080)    | 0.04034+<br>(0.02115)    | 0.04267*<br>(0.02156)    |
| Memory loss                               | -0.21210+<br>(0.11605)   | 0.00128<br>(0.00082)     | 0.00132<br>(0.00082)     | 0.04141+<br>(0.02319)    | 0.04280+<br>(0.02227)    |
| Indwelling catheter                       | 0.53389*<br>(0.24047)    | 0.00233<br>(0.00200)     | 0.00217<br>(0.00201)     | 0.08892*<br>(0.04030)    | 0.08399*<br>(0.03979)    |
| Disruptive behavior                       | -0.38013<br>(0.25396)    | 0.00126<br>(0.00218)     | 0.00137<br>(0.00217)     | 0.06210<br>(0.05239)     | 0.06488<br>(0.04826)     |
| Unknown                                   | 0.15559<br>(0.42629)     | 0.00105<br>(0.00243)     | 0.00119<br>(0.00256)     | 0.07893<br>(0.06361)     | 0.08391<br>(0.07287)     |
| None of the above                         | -0.13622<br>(0.11413)    | 0.00168+<br>(0.00087)    | 0.00175*<br>(0.00087)    | 0.06114*<br>(0.02410)    | 0.06350**<br>(0.02358)   |
| <b>Risks for hospitalization</b>          |                          |                          |                          |                          |                          |
| 2+ falls in past 12 months                | 0.36783***<br>(0.07489)  | 0.00159**<br>(0.00055)   | 0.00144**<br>(0.00055)   | 0.03433*<br>(0.01517)    | 0.03023+<br>(0.01543)    |
| Currently taking 5+ medications           | 0.14459<br>(0.09268)     | -0.00229***<br>(0.00051) | -0.00241***<br>(0.00051) | -0.12320***<br>(0.01803) | -0.12666***<br>(0.01809) |
| 2+ hospitalizations in past 6 months      | 0.02020<br>(0.12621)     | 0.00147<br>(0.00091)     | 0.00141<br>(0.00091)     | 0.06844*<br>(0.02695)    | 0.06751**<br>(0.02510)   |
| Decline in mental health in past 3 months | 0.28961+<br>(0.16621)    | 0.00047<br>(0.00117)     | 0.00043<br>(0.00117)     | -0.01185<br>(0.03938)    | -0.01347<br>(0.03447)    |
| Other risks                               | -0.10816<br>(0.12022)    | 0.00143*<br>(0.00070)    | 0.00142*<br>(0.00071)    | 0.03441+<br>(0.01966)    | 0.03468+<br>(0.01904)    |
| <b>High risk factors</b>                  |                          |                          |                          |                          |                          |
| Obesity                                   | 0.19755*<br>(0.07791)    | -0.00065<br>(0.00052)    | -0.00073<br>(0.00052)    | -0.02649<br>(0.01626)    | -0.02901+<br>(0.01545)   |
| Smoking                                   | -0.69461***<br>(0.09267) | 0.00143*<br>(0.00065)    | 0.00157*<br>(0.00065)    | 0.05879***<br>(0.01733)  | 0.06243***<br>(0.01708)  |
| Alcohol                                   | -0.74504***<br>(0.17673) | -0.00279*<br>(0.00128)   | -0.00265*<br>(0.00128)   | -0.06540+<br>(0.03695)   | -0.06079+<br>(0.03584)   |
| Drugs                                     | -0.15452<br>(0.25132)    | 0.00077<br>(0.00200)     | 0.00075<br>(0.00200)     | 0.03197<br>(0.04740)     | 0.03185<br>(0.04647)     |
| Residuals                                 |                          |                          |                          | 0.00812***<br>(0.00132)  |                          |
| Observations                              | 393,858                  | 393,858                  | 393,858                  | 393,858                  | 393,858                  |
| $R^2$                                     | 0.25542                  |                          | 0.06603                  |                          |                          |

*Notes.* Leave-out instrumental variable (IV) is the within-provider average visit length of all other episodes' visits conducted by each provider in the 30-day period before and after the focal home health visit. All models are estimated at the home health visit level. Robust standard errors (in parentheses) allow for arbitrary correlation within a given home health provider. + $p < 0.10$ , \* $p < 0.05$ , \*\* $p < 0.01$ , \*\*\* $p < 0.001$ .

**Table EC.3** Effect of visit length on hospital readmission, using hazard models, including coefficients for all control variables

| VARIABLES                                                     | (1)<br>First stage       | (2)<br>Cox proportional hazards model | (3)<br>Proportional hazard model with competing risk of subsequent home health visit |
|---------------------------------------------------------------|--------------------------|---------------------------------------|--------------------------------------------------------------------------------------|
| Leave-out IV                                                  | 0.63071***<br>(0.00233)  |                                       |                                                                                      |
| Visit length                                                  |                          | -0.01799***<br>(0.00261)              | -0.01684***<br>(0.00260)                                                             |
| <i>Visit length subhazard ratio</i>                           |                          | 0.98217***<br>(0.00257)               | 0.98330***<br>(0.00256)                                                              |
| <b>Operational characteristics</b>                            |                          |                                       |                                                                                      |
| Visit sequence percentile                                     | -0.22375*<br>(0.08812)   | -0.96284***<br>(0.08694)              | 2.50896***<br>(0.08624)                                                              |
| Moving average of visit length                                | 0.21254***<br>(0.00168)  | 0.02346***<br>(0.00154)               | 0.01921***<br>(0.00158)                                                              |
| Moving average of days to next visit                          | -0.34758***<br>(0.01086) | 0.07758***<br>(0.00341)               | 0.12491***<br>(0.00463)                                                              |
| New patient for provider                                      | 2.17532***<br>(0.05820)  | 0.55046***<br>(0.04036)               | 0.40562***<br>(0.04753)                                                              |
| Episode with subsequent episodes                              | 0.94917***<br>(0.12634)  | -2.42309***<br>(0.04374)              | -2.29651***<br>(0.04446)                                                             |
| Episode with any resumption of care or recertification visits | 0.44159***<br>(0.11379)  | 3.02660***<br>(0.02894)               | 3.38049***<br>(0.02818)                                                              |
| <b>Prior hospitalization reasons</b>                          |                          |                                       |                                                                                      |
| Intractable pain                                              | 0.68637***<br>(0.05909)  | -0.00500<br>(0.04146)                 | -0.04488<br>(0.04272)                                                                |
| None of the above                                             | -0.12488**<br>(0.04155)  | -0.04270<br>(0.02877)                 | -0.05820+<br>(0.02984)                                                               |
| Residuals                                                     |                          | 0.01867***<br>(0.00280)               | 0.01736***<br>(0.00294)                                                              |
| Observations                                                  | 392,864                  | 392,864                               | 392,864                                                                              |
| $R^2$                                                         | 0.25398                  |                                       |                                                                                      |

*Notes.* Leave-out instrumental variable (IV) is the within-provider average visit length of all other episodes' visits conducted by each provider in the 30-day period before and after the focal home health visit. All models are estimated at the home health visit level. Due to computational intractability when using a long set of control variables, we use an alternate set of control variables that are selected as the most predictive elements as determined by the least absolute shrinkage and selection operator (LASSO) procedure (see the relevant discussion in section 7.2 and the list of control variables in Table EC.1). Robust standard errors (in parentheses) allow for arbitrary correlation within a given home health provider. + $p < 0.10$ , \* $p < 0.05$ , \*\* $p < 0.01$ , \*\*\* $p < 0.001$ .

**Table EC.4 Heterogeneous effects of visit length on hospital readmission, by patient characteristics, including coefficients for all control variables**

| VARIABLES                                                        | (1)<br>2SLS,<br>by OASIS items | (2)<br>2SLS,<br>by HRRP target status |
|------------------------------------------------------------------|--------------------------------|---------------------------------------|
| Visit length                                                     | -0.00025***<br>(0.00005)       | -0.00022***<br>(0.00004)              |
| Visit length × Stable                                            | 0.00024**<br>(0.00009)         |                                       |
| Visit length × Living alone                                      | 0.00009<br>(0.00007)           |                                       |
| Visit length × Intractable pain                                  | -0.00015+<br>(0.00008)         |                                       |
| Visit length × Decline in mental health<br>in past 3 months      | 0.00033*<br>(0.00015)          |                                       |
| Targeted by HRRP                                                 |                                | 0.00612<br>(0.00580)                  |
| Visit length × Targeted by HRRP                                  |                                | -0.00005<br>(0.00013)                 |
| <b>Operational characteristics</b>                               |                                |                                       |
| Visit sequence percentile                                        | 0.03315***<br>(0.00117)        | 0.03318***<br>(0.00117)               |
| Moving average of visit length                                   | 0.00029***<br>(0.00003)        | 0.00029***<br>(0.00003)               |
| Moving average of days to next visit                             | 0.00857***<br>(0.00033)        | 0.00856***<br>(0.00033)               |
| New patient for provider                                         | 0.00781***<br>(0.00069)        | 0.00780***<br>(0.00069)               |
| Start hour of provider                                           | -0.00024*<br>(0.00012)         | -0.00024*<br>(0.00012)                |
| Episode with subsequent episodes                                 | -0.14459***<br>(0.00381)       | -0.14458***<br>(0.00381)              |
| Episode with any resumption of care<br>or recertification visits | 0.15957***<br>(0.00377)        | 0.15954***<br>(0.00377)               |
| <b>Demographic characteristics</b>                               |                                |                                       |
| Age                                                              | 0.00006**<br>(0.00002)         | 0.00005**<br>(0.00002)                |
| Male                                                             | 0.00015<br>(0.00044)           | 0.00014<br>(0.00044)                  |
| White                                                            | 0.01196***<br>(0.00308)        | 0.01199***<br>(0.00308)               |
| Black                                                            | 0.01351***<br>(0.00317)        | 0.01361***<br>(0.00318)               |
| Hispanic                                                         | 0.01230***<br>(0.00325)        | 0.01237***<br>(0.00326)               |
| Asian                                                            | 0.01142**<br>(0.00365)         | 0.01148**<br>(0.00366)                |
| <b>Health status</b>                                             |                                |                                       |
| Temporarily heightened                                           | -0.00459***<br>(0.00056)       | -0.00450***<br>(0.00056)              |
| Stable                                                           | -0.01833***<br>(0.00410)       | -0.00760***<br>(0.00080)              |
| Progressively worse                                              | 0.00460**<br>(0.00175)         | 0.00447*<br>(0.00175)                 |

**Table EC.4 Heterogeneous effects of visit length on hospital readmission, by patient characteristics, including coefficients for all control variables — Continued**

| VARIABLES                                 | (1)<br>2SLS,<br>by OASIS items | (2)<br>2SLS,<br>by HRRP target status |
|-------------------------------------------|--------------------------------|---------------------------------------|
| <b>Living conditions</b>                  |                                |                                       |
| Living alone                              | -0.00462<br>(0.00311)          | -0.00060<br>(0.00047)                 |
| No assistance available                   | -0.00242<br>(0.00169)          | -0.00253<br>(0.00169)                 |
| <b>Prior hospitalization reason</b>       |                                |                                       |
| Urinary incontinence                      | 0.00173*<br>(0.00076)          | 0.00168*<br>(0.00076)                 |
| Intractable pain                          | 0.00901*<br>(0.00376)          | 0.00240**<br>(0.00084)                |
| Impaired decision making                  | 0.00149+<br>(0.00080)          | 0.00147+<br>(0.00080)                 |
| Memory loss                               | 0.00129<br>(0.00082)           | 0.00129<br>(0.00082)                  |
| Indwelling catheter                       | 0.00235<br>(0.00200)           | 0.00239<br>(0.00200)                  |
| Disruptive behavior                       | 0.00127<br>(0.00217)           | 0.00121<br>(0.00217)                  |
| Unknown                                   | 0.00106<br>(0.00247)           | 0.00106<br>(0.00248)                  |
| None of the above                         | 0.00168+<br>(0.00087)          | 0.00167+<br>(0.00087)                 |
| <b>Risks for hospitalization</b>          |                                |                                       |
| 2+ falls in past 12 months                | 0.00158**<br>(0.00055)         | 0.00169**<br>(0.00055)                |
| Currently taking 5+ medications           | -0.00228***<br>(0.00051)       | -0.00230***<br>(0.00051)              |
| 2+ hospitalizations in past 6 months      | 0.00147<br>(0.00091)           | 0.00142<br>(0.00091)                  |
| Decline in mental health in past 3 months | -0.01418*<br>(0.00676)         | 0.00059<br>(0.00117)                  |
| Other risks                               | 0.00148*<br>(0.00070)          | 0.00143*<br>(0.00070)                 |
| <b>High risk factors</b>                  |                                |                                       |
| Obesity                                   | -0.00066<br>(0.00052)          | -0.00066<br>(0.00052)                 |
| Smoking                                   | 0.00144*<br>(0.00065)          | 0.00116+<br>(0.00065)                 |
| Alcohol                                   | -0.00284*<br>(0.00128)         | -0.00266*<br>(0.00128)                |
| Drugs                                     | 0.00078<br>(0.00200)           | 0.00077<br>(0.00200)                  |
| Observations                              | 393,858                        | 393,858                               |

*Notes.* All models are estimated at the home health visit level. Robust standard errors (in parentheses) allow for arbitrary correlation within a given home health provider. + $p < 0.10$ , \* $p < 0.05$ , \*\* $p < 0.01$ , \*\*\* $p < 0.001$ .

**Table EC.5 Heterogeneous effects of visit length on hospital readmission, by visit characteristics, including coefficients for all control variables**

| VARIABLES                                                        | (1)<br>2SLS,<br>by visit sequence | (2)<br>2SLS,<br>by visit type |
|------------------------------------------------------------------|-----------------------------------|-------------------------------|
| Visit length                                                     | -0.00053***<br>(0.00007)          |                               |
| Visit sequence                                                   | -0.00101***<br>(0.00020)          |                               |
| Visit length × Visit sequence                                    | 0.00004***<br>(0.00000)           |                               |
| Visit length × Nursing visit                                     |                                   | -0.00028***<br>(0.00004)      |
| Visit length × Therapy visit                                     |                                   | -0.00022***<br>(0.00004)      |
| <b>Operational characteristics</b>                               |                                   |                               |
| Visit sequence percentile                                        |                                   | 0.03319***<br>(0.00106)       |
| Moving average of visit length                                   | -0.00032***<br>(0.00003)          | 0.00030***<br>(0.00002)       |
| Moving average of days to next visit                             | 0.03044***<br>(0.00088)           | 0.00867***<br>(0.00027)       |
| New patient for provider                                         | -0.00323***<br>(0.00067)          | 0.00800***<br>(0.00068)       |
| Start hour of provider                                           | -0.00035**<br>(0.00013)           | -0.00022+<br>(0.00012)        |
| Episode with subsequent episodes                                 |                                   | -0.14443***<br>(0.00378)      |
| Episode with any resumption of care<br>or recertification visits |                                   | 0.15984***<br>(0.00369)       |
| <b>Demographic characteristics</b>                               |                                   |                               |
| Age                                                              |                                   | 0.00005*<br>(0.00002)         |
| Male                                                             |                                   | 0.00022<br>(0.00044)          |
| White                                                            |                                   | 0.01194***<br>(0.00323)       |
| Black                                                            |                                   | 0.01345***<br>(0.00331)       |
| Hispanic                                                         |                                   | 0.01230***<br>(0.00338)       |
| Asian                                                            |                                   | 0.01125**<br>(0.00360)        |
| <b>Health status</b>                                             |                                   |                               |
| Temporarily heightened                                           |                                   | -0.00470***<br>(0.00055)      |
| Stable                                                           |                                   | -0.00810***<br>(0.00074)      |
| Progressively worse                                              |                                   | 0.00468**<br>(0.00172)        |

**Table EC.5 Heterogeneous effects of visit length on hospital readmission, by visit characteristics, including coefficients for all control variables — Continued**

| VARIABLES                                 | (1)<br>2SLS,<br>by visit sequence | (2)<br>2SLS,<br>by visit type |
|-------------------------------------------|-----------------------------------|-------------------------------|
| <b>Living conditions</b>                  |                                   |                               |
| Living alone                              |                                   | -0.00050<br>(0.00049)         |
| No assistance available                   |                                   | -0.00239<br>(0.00156)         |
| <b>Prior hospitalization reason</b>       |                                   |                               |
| Urinary incontinence                      |                                   | 0.00173*<br>(0.00077)         |
| Intractable pain                          |                                   | 0.00218*<br>(0.00085)         |
| Impaired decision making                  |                                   | 0.00149+<br>(0.00081)         |
| Memory loss                               |                                   | 0.00120<br>(0.00086)          |
| Indwelling catheter                       |                                   | 0.00251<br>(0.00209)          |
| Disruptive behavior                       |                                   | 0.00124<br>(0.00240)          |
| Unknown                                   |                                   | 0.00118<br>(0.00223)          |
| None of the above                         |                                   | 0.00177*<br>(0.00089)         |
| <b>Risks for hospitalization</b>          |                                   |                               |
| 2+ falls in past 12 months                |                                   | 0.00137*<br>(0.00053)         |
| Currently taking 5+ medications           |                                   | -0.00238***<br>(0.00053)      |
| 2+ hospitalizations in past 6 months      |                                   | 0.00159+<br>(0.00096)         |
| Decline in mental health in past 3 months |                                   | 0.00044<br>(0.00138)          |
| Other risks                               |                                   | 0.00155*<br>(0.00075)         |
| <b>High risk factors</b>                  |                                   |                               |
| Obesity                                   |                                   | -0.00057<br>(0.00054)         |
| Smoking                                   |                                   | 0.00149*<br>(0.00065)         |
| Alcohol                                   |                                   | -0.00284*<br>(0.00133)        |
| Drugs                                     |                                   | 0.00079<br>(0.00196)          |
| Observations                              | 387,319                           | 393,858                       |
| Episode fixed effect                      | Y                                 | N                             |
| <i>F</i> -statistic for coefficients      |                                   | 28.15878***                   |

*Notes.* All models are estimated at the home health visit level. Robust standard errors (in parentheses) allow for arbitrary correlation within a given home health provider. + $p < 0.10$ , \* $p < 0.05$ , \*\* $p < 0.01$ , \*\*\* $p < 0.001$ .

**Table EC.6 Effect of visit length on hospital readmission, using fixed effects**

| VARIABLES                          | (1)                      | (2)                      | (3)                      |
|------------------------------------|--------------------------|--------------------------|--------------------------|
|                                    | 2SLS                     | 2SLS                     | 2SLS                     |
| Visit length                       | -0.00022***<br>(0.00004) | -0.00026***<br>(0.00004) | -0.00026***<br>(0.00004) |
| Observations                       | 393,858                  | 393,858                  | 393,858                  |
| Operational characteristics        | Y                        | Y                        | Y                        |
| Demographic characteristics        | Y                        | Y                        | Y                        |
| Health status                      | Y                        | Y                        | Y                        |
| Living conditions                  | Y                        | Y                        | Y                        |
| Prior hospitalization reasons      | Y                        | Y                        | Y                        |
| Risks for hospitalization          | Y                        | Y                        | Y                        |
| High risk factors                  | Y                        | Y                        | Y                        |
| Quarter fixed effect               | Y                        | N                        | N                        |
| Provider type fixed effect         | N                        | Y                        | N                        |
| Quarter-Provider type fixed effect | N                        | N                        | Y                        |

*Notes.* All models are estimated at the home health visit level. Robust standard errors (in parentheses) allow for arbitrary correlation within a given home health provider. Controls not shown include operational characteristics (visit sequence percentile, moving average of visit length, moving average of days to next visit, new patient for provider, start hour of provider, episode with subsequent episodes, episode with any resumption of care or recertification visits), demographic characteristics (age, male, white, black, Hispanic, Asian), health status (temporarily heightened, stable, progressively worse), living conditions (living alone, no assistance available), prior hospitalization reasons (urinary incontinence, intractable pain, impaired decision making, memory loss, indwelling catheter, disruptive behavior, unknown, none of the above), risks for hospitalization (2+ falls in past 12 months, currently taking 5+ medications, 2+ hospitalizations in past 6 months, decline in mental health in past 3 months, other risks), and high risk factors (obesity, smoking, alcohol, drugs). + $p < 0.10$ , \* $p < 0.05$ , \*\* $p < 0.01$ , \*\*\* $p < 0.001$ .

**Table EC.7** Effect of leave-out IV on pre-planned readmission and on hospitalization following discharge from a lower-acuity facility

| VARIABLES                     | (1)<br>Pre-planned<br>readmission                                                      | (2)<br>Pre-planned<br>readmission | (3)<br>Hospitalization<br>following discharge<br>from a lower-<br>acuity facility                    | (4)<br>Hospitalization<br>following discharge<br>from a lower-<br>acuity facility |
|-------------------------------|----------------------------------------------------------------------------------------|-----------------------------------|------------------------------------------------------------------------------------------------------|-----------------------------------------------------------------------------------|
| Leave-out IV                  | 0.00001<br>(0.00001)                                                                   |                                   | -0.00006<br>(0.00005)                                                                                |                                                                                   |
| Visit length                  |                                                                                        | -0.00001<br>(0.00001)             |                                                                                                      | -0.00007<br>(0.00006)                                                             |
| Observations                  | 397,508                                                                                | 397,508                           | 104,960                                                                                              | 104,960                                                                           |
| Operational characteristics   | Y                                                                                      | Y                                 | Y                                                                                                    | Y                                                                                 |
| Demographic characteristics   | Y                                                                                      | Y                                 | Y                                                                                                    | Y                                                                                 |
| Health status                 | Y                                                                                      | Y                                 | Y                                                                                                    | Y                                                                                 |
| Living conditions             | Y                                                                                      | Y                                 | Y                                                                                                    | Y                                                                                 |
| Prior hospitalization reasons | Y                                                                                      | Y                                 | Y                                                                                                    | Y                                                                                 |
| Risks for hospitalization     | Y                                                                                      | Y                                 | Y                                                                                                    | Y                                                                                 |
| High risk factors             | Y                                                                                      | Y                                 | Y                                                                                                    | Y                                                                                 |
| Model                         | OLS                                                                                    | 2SLS                              | OLS                                                                                                  | 2SLS                                                                              |
| Sample                        | Main analysis sample expanded<br>to include patients with a<br>pre-planned readmission |                                   | Patients admitted to home health<br>following discharge from an<br>inpatient rehabilitation facility |                                                                                   |

*Notes.* Leave-out instrumental variable (IV) is the within-provider average visit length of all other episodes' visits conducted by each provider in the 30-day period before and after the focal home health visit. All models are estimated at the home health visit level. Robust standard errors (in parentheses) allow for arbitrary correlation within a given home health provider. Controls not shown include operational characteristics (visit sequence percentile, moving average of visit length, moving average of days to next visit, new patient for provider, start hour of provider, episode with subsequent episodes, episode with any resumption of care or recertification visits), demographic characteristics (age, male, white, black, Hispanic, Asian), health status (temporarily heightened, stable, progressively worse), living conditions (living alone, no assistance available), prior hospitalization reasons (urinary incontinence, intractable pain, impaired decision making, memory loss, indwelling catheter, disruptive behavior, unknown, none of the above), risks for hospitalization (2+ falls in past 12 months, currently taking 5+ medications, 2+ hospitalizations in past 6 months, decline in mental health in past 3 months, other risks), and high risk factors (obesity, smoking, alcohol, drugs).  $+p < 0.10$ ,  $*p < 0.05$ ,  $**p < 0.01$ ,  $***p < 0.001$ .

**Table EC.8** Effect of visit length on hospital readmission, using alternate set of control variables

| VARIABLES                                                     | (1)<br>First stage       | (2)<br>2SLS              | (3)<br>OLS               | (4)<br>2SRI              | (5)<br>Probit            |
|---------------------------------------------------------------|--------------------------|--------------------------|--------------------------|--------------------------|--------------------------|
| Leave-out IV                                                  | 0.63104***<br>(0.01170)  |                          |                          |                          |                          |
| Visit length                                                  |                          | -0.00023***<br>(0.00004) | 0.00003<br>(0.00002)     | -0.00733***<br>(0.00121) | -0.00000<br>(0.00046)    |
| <i>AME of visit length</i>                                    |                          |                          |                          | -0.00024***<br>(0.00004) | -0.00000<br>(0.00002)    |
| <b>Operational characteristics</b>                            |                          |                          |                          |                          |                          |
| Visit sequence percentile                                     | -0.21931<br>(0.13655)    | 0.03282***<br>(0.00117)  | 0.03232***<br>(0.00116)  | 1.28230***<br>(0.03205)  | 1.26944***<br>(0.03310)  |
| Moving average of visit length                                | 0.21248***<br>(0.00452)  | 0.00027***<br>(0.00003)  | 0.00018***<br>(0.00002)  | 0.00884***<br>(0.00068)  | 0.00625***<br>(0.00058)  |
| Moving average of days to next visit                          | -0.34468***<br>(0.02322) | 0.00859***<br>(0.00032)  | 0.00868***<br>(0.00032)  | 0.09763***<br>(0.00264)  | 0.10038***<br>(0.00349)  |
| New patient for provider                                      | 2.17248***<br>(0.15391)  | 0.00797***<br>(0.00069)  | 0.00750***<br>(0.00069)  | 0.21359***<br>(0.01847)  | 0.20072***<br>(0.01852)  |
| Episode with subsequent episodes                              | 0.94140***<br>(0.19610)  | -0.14491***<br>(0.00381) | -0.14511***<br>(0.00382) | -1.16433***<br>(0.02432) | -1.16921***<br>(0.02395) |
| Episode with any resumption of care or recertification visits | 0.44906**<br>(0.17051)   | 0.16055***<br>(0.00378)  | 0.16043***<br>(0.00378)  | 1.63430***<br>(0.01928)  | 1.62995***<br>(0.01930)  |
| <b>Prior hospitalization reasons</b>                          |                          |                          |                          |                          |                          |
| Intractable pain                                              | 0.68743***<br>(0.11881)  | -0.00056<br>(0.00063)    | -0.00077<br>(0.00063)    | -0.02499<br>(0.01849)    | -0.03145+<br>(0.01907)   |
| None of the above                                             | -0.12341<br>(0.08452)    | -0.00217***<br>(0.00046) | -0.00209***<br>(0.00046) | -0.04806***<br>(0.01329) | -0.04611***<br>(0.01307) |
| Residuals                                                     |                          |                          |                          | 0.00860***<br>(0.00131)  |                          |
| Observations                                                  | 393,858                  | 393,858                  | 393,858                  | 393,858                  | 393,858                  |
| $R^2$                                                         | 0.25383                  |                          | 0.06514                  |                          |                          |

*Notes.* Leave-out instrumental variable (IV) is the within-provider average visit length of all other episodes' visits conducted by each provider in the 30-day period before and after the focal home health visit. All models are estimated at the home health visit level. Robust standard errors (in parentheses) allow for arbitrary correlation within a given home health provider. + $p < 0.10$ , \* $p < 0.05$ , \*\* $p < 0.01$ , \*\*\* $p < 0.001$ .

**Table EC.9** Effect of visit length on hospital readmission, using alternate estimation models

| VARIABLES                     | (1)                          | (2)                         |
|-------------------------------|------------------------------|-----------------------------|
|                               | Two-stage skewed logit model | Two-stage multi-level model |
| Visit length                  | -0.02334***<br>(0.00452)     | -0.00018***<br>(0.00004)    |
| <i>AME of visit length</i>    | -0.00022***<br>(0.00004)     |                             |
| Observations                  | 393,858                      | 393,858                     |
| Operational characteristics   | Y                            | Y                           |
| Demographic characteristics   | Y                            | Y                           |
| Health status                 | Y                            | Y                           |
| Living conditions             | Y                            | Y                           |
| Prior hospitalization reasons | Y                            | Y                           |
| Risks for hospitalization     | Y                            | Y                           |
| High risk factors             | Y                            | Y                           |

*Notes.* All models are estimated at the home health visit level. Robust standard errors (in parentheses) allow for arbitrary correlation within a given home health provider. Controls not shown include operational characteristics (visit sequence percentile, moving average of visit length, moving average of days to next visit, new patient for provider, start hour of provider, episode with subsequent episodes, episode with any resumption of care or recertification visits), demographic characteristics (age, male, white, black, Hispanic, Asian), health status (temporarily heightened, stable, progressively worse), living conditions (living alone, no assistance available), prior hospitalization reasons (urinary incontinence, intractable pain, impaired decision making, memory loss, indwelling catheter, disruptive behavior, unknown, none of the above), risks for hospitalization (2+ falls in past 12 months, currently taking 5+ medications, 2+ hospitalizations in past 6 months, decline in mental health in past 3 months, other risks), and high risk factors (obesity, smoking, alcohol, drugs). + $p < 0.10$ , \* $p < 0.05$ , \*\* $p < 0.01$ , \*\*\* $p < 0.001$ .

**Table EC.10** Effect of visit length on hospitalization, using sample not restricted to patients previously discharged from short-term acute care hospital

| VARIABLES                  | (1)                     | (2)                      | (3)                  | (4)                      | (5)                   |
|----------------------------|-------------------------|--------------------------|----------------------|--------------------------|-----------------------|
|                            | First stage             | 2SLS                     | OLS                  | 2SRI                     | Probit                |
| Leave-out IV               | 0.79125***<br>(0.00813) |                          |                      |                          |                       |
| Visit length               |                         | -0.00020***<br>(0.00002) | 0.00001<br>(0.00001) | -0.00742***<br>(0.00064) | -0.00006<br>(0.00031) |
| <i>AME of visit length</i> |                         |                          |                      | -0.00020***<br>(0.00002) | -0.00000<br>(0.00001) |
| Residuals                  |                         |                          |                      | 0.00907***<br>(0.00072)  |                       |
| Observations               | 1,189,183               | 1,189,183                | 1,189,183            | 1,189,183                | 1,189,183             |
| $R^2$                      | 0.29944                 |                          | 0.04589              |                          |                       |

*Notes.* Leave-out instrumental variable (IV) is the within-provider average visit length of all other episodes' visits conducted by each provider in the 30-day period before and after the focal home health visit. All models are estimated at the home health visit level. Robust standard errors (in parentheses) allow for arbitrary correlation within a given home health provider. + $p < 0.10$ , \* $p < 0.05$ , \*\* $p < 0.01$ , \*\*\* $p < 0.001$ .

**Figure EC.1 Predicted probability of hospital readmission using alternate non-linear models**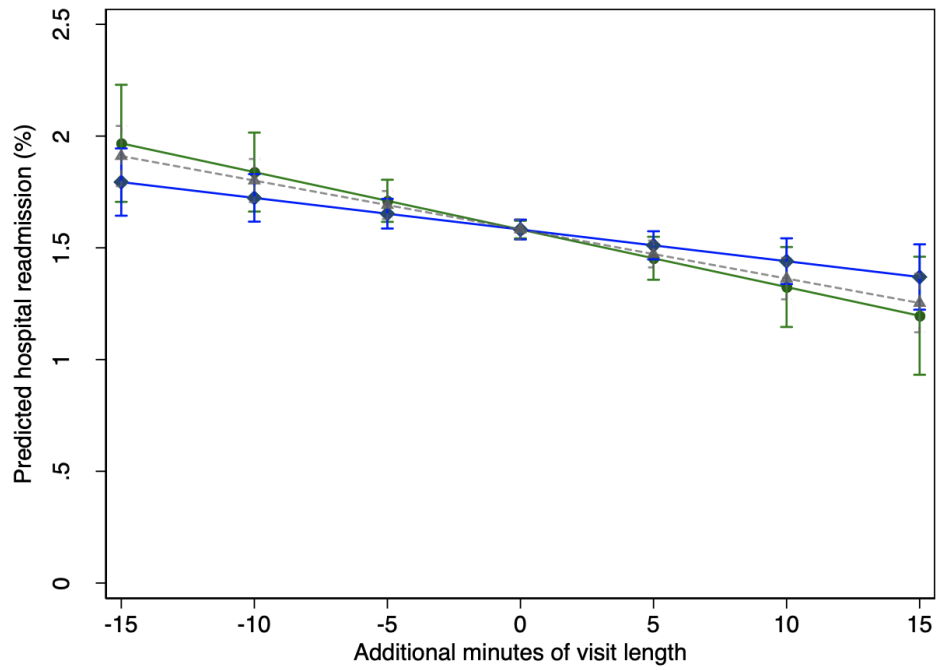

*Note.* This figure plots the predicted probabilities of hospital readmission given various amounts of additional minutes of visit length using estimates from a linear 2SLS model (grey triangles), a non-linear piecewise model (green circles), and a non-linear quadratic model (blue diamonds). Bars show the 95% confidence intervals using standard errors that are clustered by the home health provider and bootstrapped based on 1,000 replications.
